# Supplementary material for: Effects of mild alternate wetting and drying irrigation and rice straw application on N 2 O emissions in rice cultivation
Source: Copernicus journal article supplement (doi:10.5194/egusphere-2022-429), 2022-06-13
Supplement: Supplementary file 1 [file egusphere-2022-429-supplement.pdf]

1 Table S1 Effects of different treatments on cumulative N<sub>2</sub>O emissions,  
 2 cumulative CH<sub>4</sub> emissions and GWP. The values denote means ± standard  
 3 errors (n=3). Different lowercase letters indicate significant differences (*P*  
 4 < 0.05).

| Treatments          | Cumulative N <sub>2</sub> O<br>emissions<br>kg ha <sup>-1</sup> | Cumulative CH <sub>4</sub><br>emissions<br>kg ha <sup>-1</sup> | GWP<br>kg CO <sub>2</sub> -eq ha <sup>-1</sup> |
|---------------------|-----------------------------------------------------------------|----------------------------------------------------------------|------------------------------------------------|
| CK                  | 1.48±0.06 ef                                                    | 19.02±0.54 ef                                                  | 916.2±25.4 e                                   |
| <sup>15</sup> S     | 1.24±0.05 f                                                     | 420.67±23.28 b                                                 | 10886.2±593.7 b                                |
| CF <sup>15</sup> U  | 4.02±0.30 c                                                     | 35.57±0.83 e                                                   | 2088.4±98.7 d                                  |
| U+ <sup>15</sup> S  | 3.89±0.09 c                                                     | 455.84±12.54 a                                                 | 12556.7±339.3 a                                |
| <sup>15</sup> U+S   | 3.76±0.02 c                                                     | 456.47±20.02 a                                                 | 12531.4±496.1 a                                |
| CK                  | 1.64±0.15 e                                                     | 14.16±0.73 f                                                   | 841.7±62.1 e                                   |
| <sup>15</sup> S     | 2.07±0.17 d                                                     | 158.48±6.97 c                                                  | 4577.5±194.7 c                                 |
| AWD <sup>15</sup> U | 4.48±0.12 b                                                     | 20.26±1.28 ef                                                  | 1842.0±63.7 d                                  |
| U+ <sup>15</sup> S  | 5.05±0.28 a                                                     | 125.33±5.88 d                                                  | 4663.7±65.8 c                                  |
| <sup>15</sup> U+S   | 5.29±0.25 a                                                     | 121.01±5.88 d                                                  | 4556.9±204.4 c                                 |

5
